# Supplementary material for: Substituent effects of the phenyl ring at different positions from the α-carbon of TEMPO-type nitroxide
Source: Royal Society of Chemistry journal article supplement (doi:10.1039/d2ob01589g), 2022-01-01
Supplement: d2ob01589g1.pdf [file d2ob01589g1.pdf]

# Substituent effects of phenyl ring in different positions from $\alpha$ - carbon of TEMPO-type nitroxide

Toshihide Yamasaki, Yuto Matsuda, Masayuki Munekane, Kohei Sano and Takahiro Mukai \*

Laboratory of Biophysical Chemistry, Kobe Pharmaceutical University, 4-19-1 Motoyamakita-  
machi, Higashinada-ku, Kobe 658-8558, Japan

Corresponding author's e-mail address: *tmukai@kobepharma-u.ac.jp*

## Table of Contents

|                          |     |
|--------------------------|-----|
| 1. Cyclic voltammetry    | S2  |
| 2. Molecular calculation | S3  |
| 3. NMR spectra           | S5  |
| 4. HPLC chromatograms    | S10 |

## 1. Cyclic voltammetry

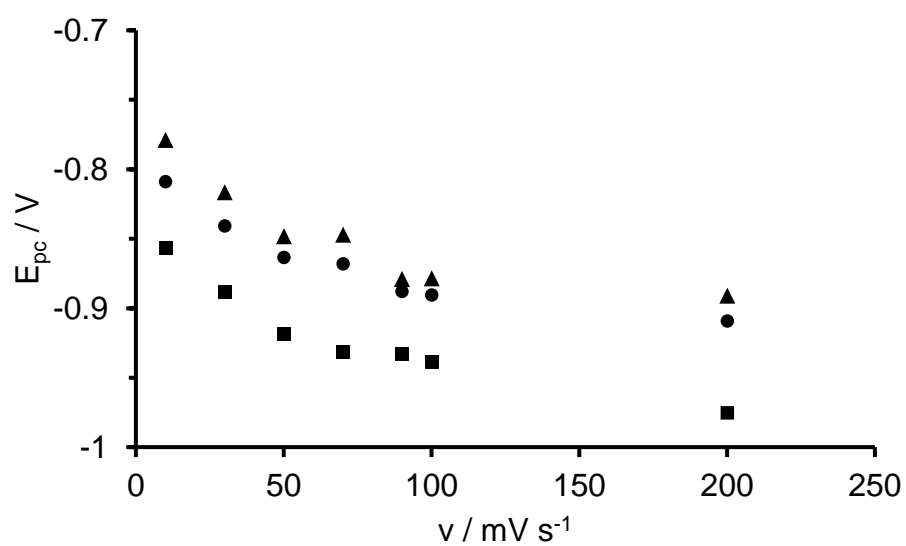

**Figure S1.**  $E_{pc}$  of nitroxide and hydroxylamine redox couple toward the scan rate. Square symbol: **1**; circle: **2**; triangle: **3**. The experimental conditions are described in Materials and Methods.

## 2. Molecular calculation

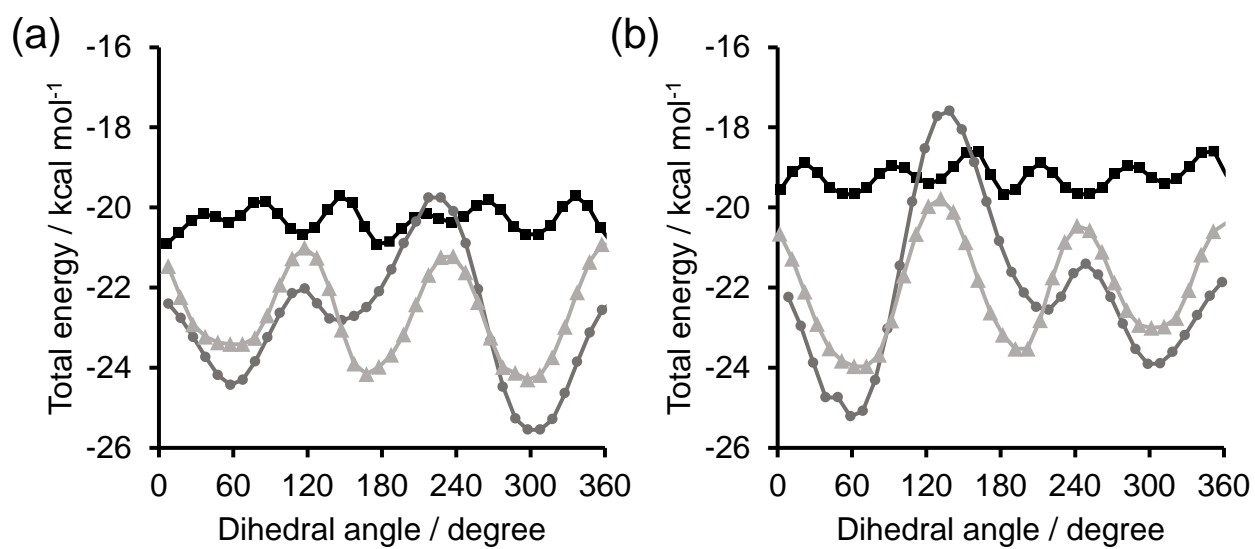

**Figure S2.** Energy diagram for the rotation of substituted group. (a) twisted boat conformation; (b) chair conformation. Black line and square symbol: **1**; dark gray line and circle symbol: **2**; light gray line and triangle symbol: **3**.

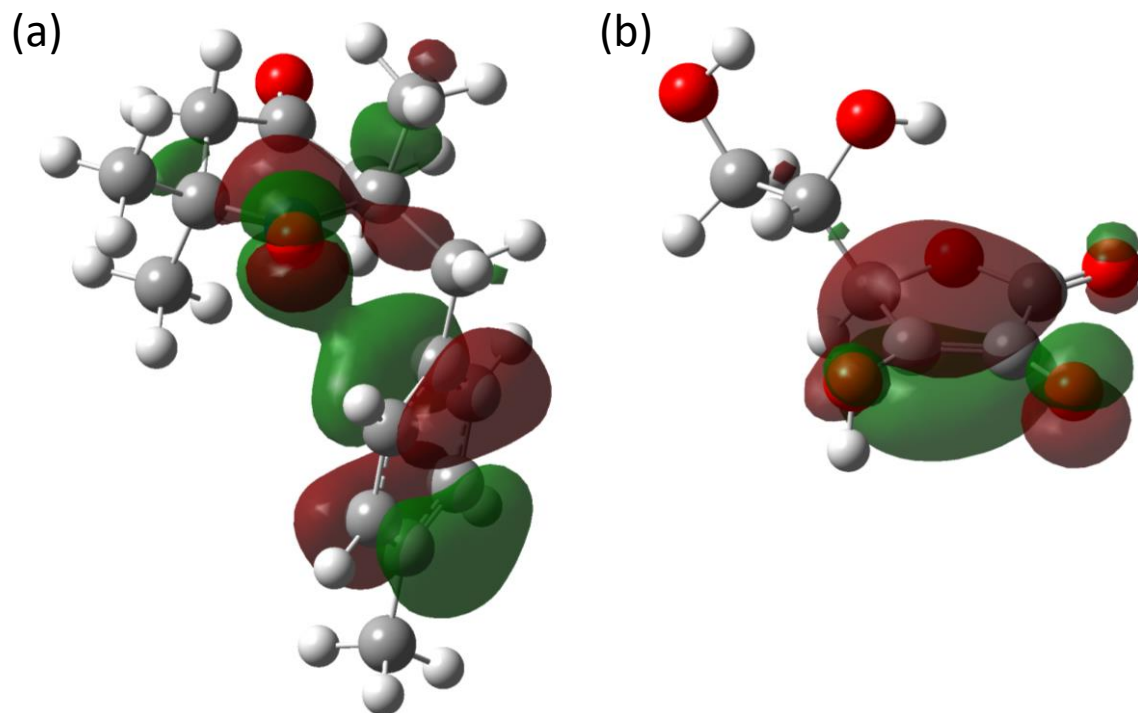

**Figure S3.** Molecular orbital contours. (a) SOMO of **2**; (b) HOMO of ascorbate anion.

### 3. NMR spectra

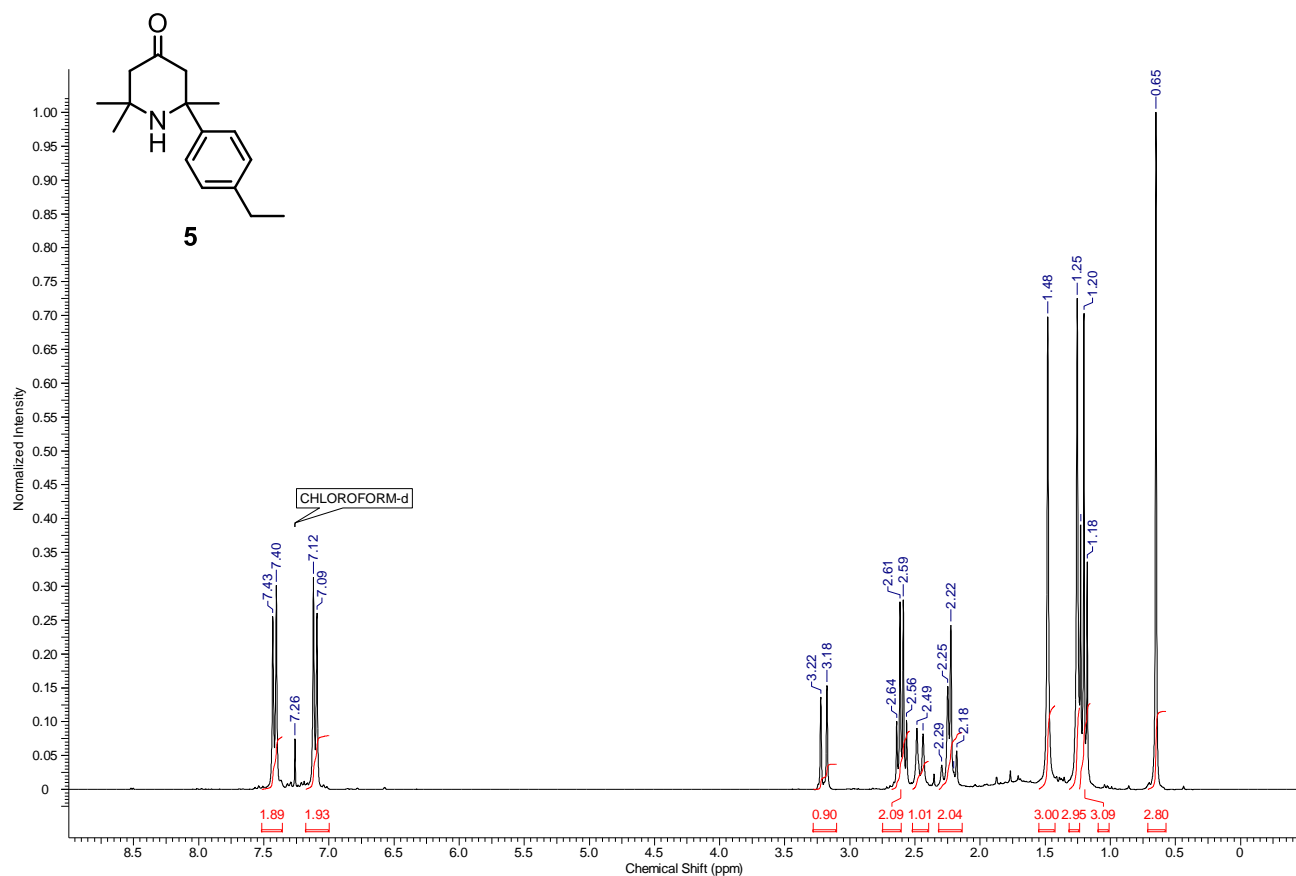

Figure S4. <sup>1</sup>H-NMR spectrum of 5.

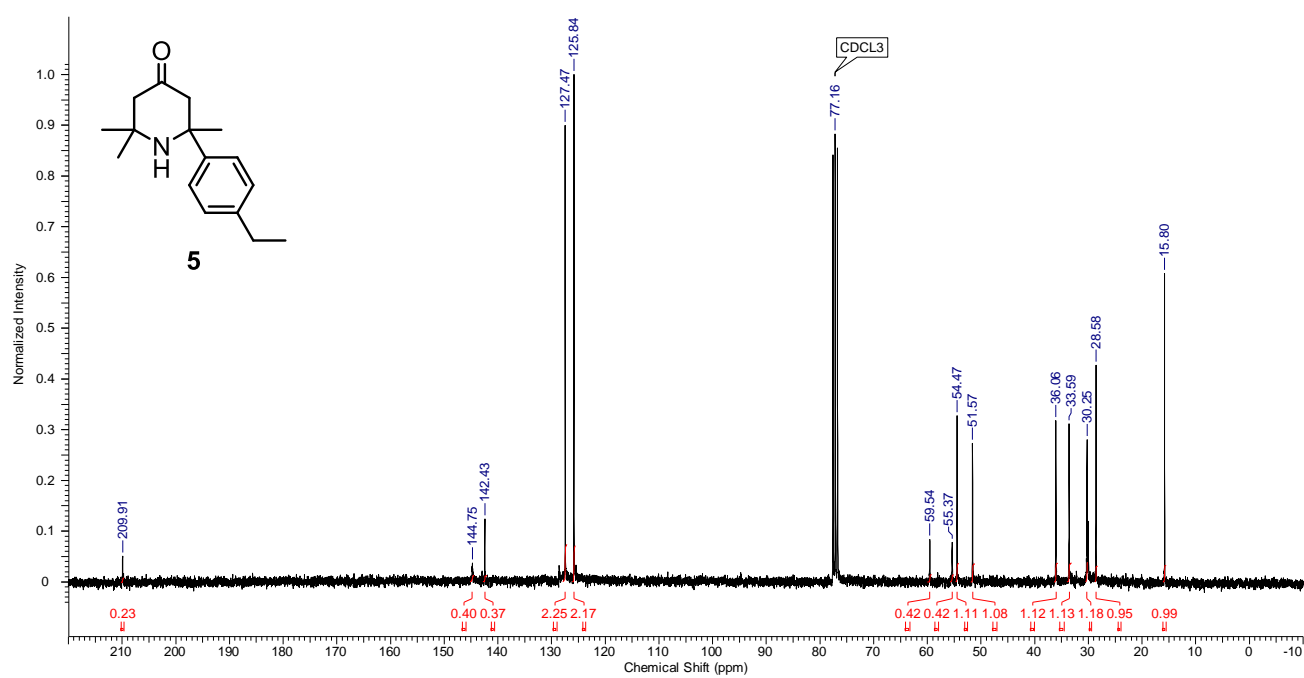

Figure S5. <sup>13</sup>C-NMR spectrum of 5.

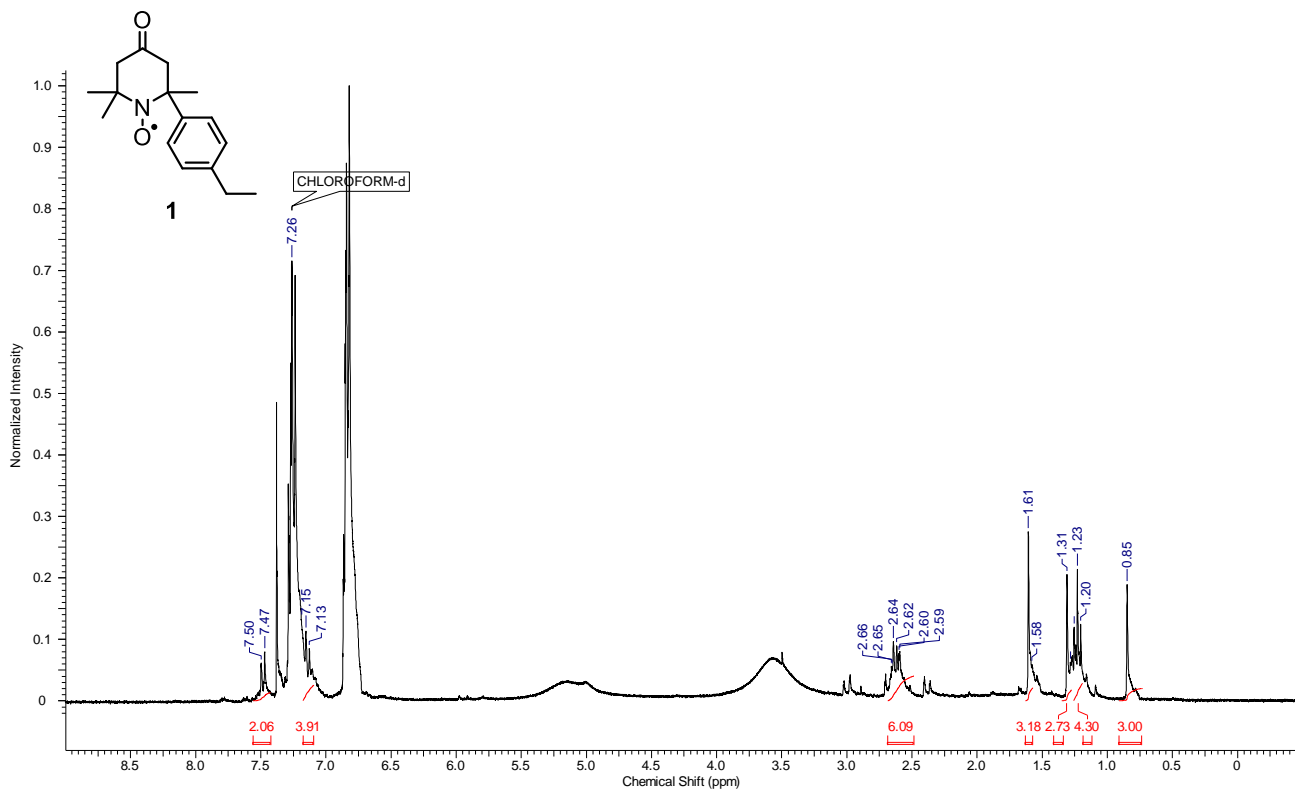

**Figure S6.**  $^1\text{H-NMR}$  spectrum of **1** added with phenylhydrazine.

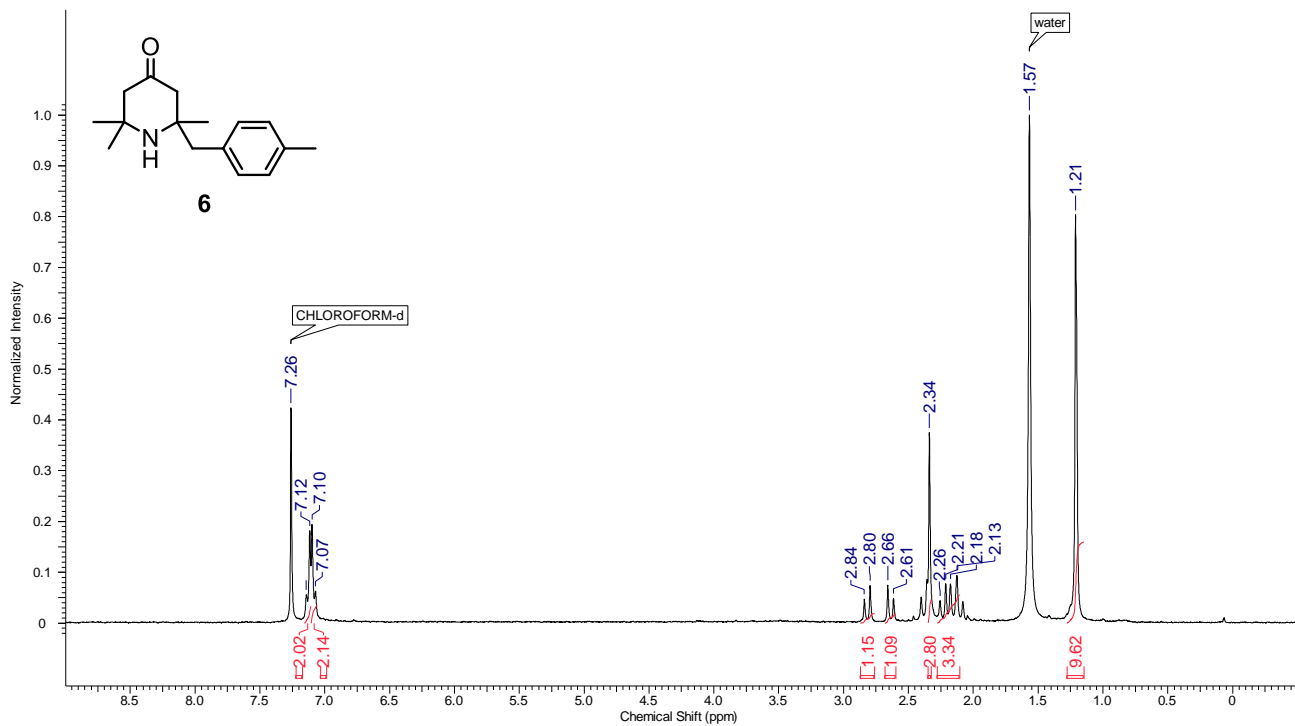

**Figure S7.**  $^1\text{H-NMR}$  spectrum of **6**.

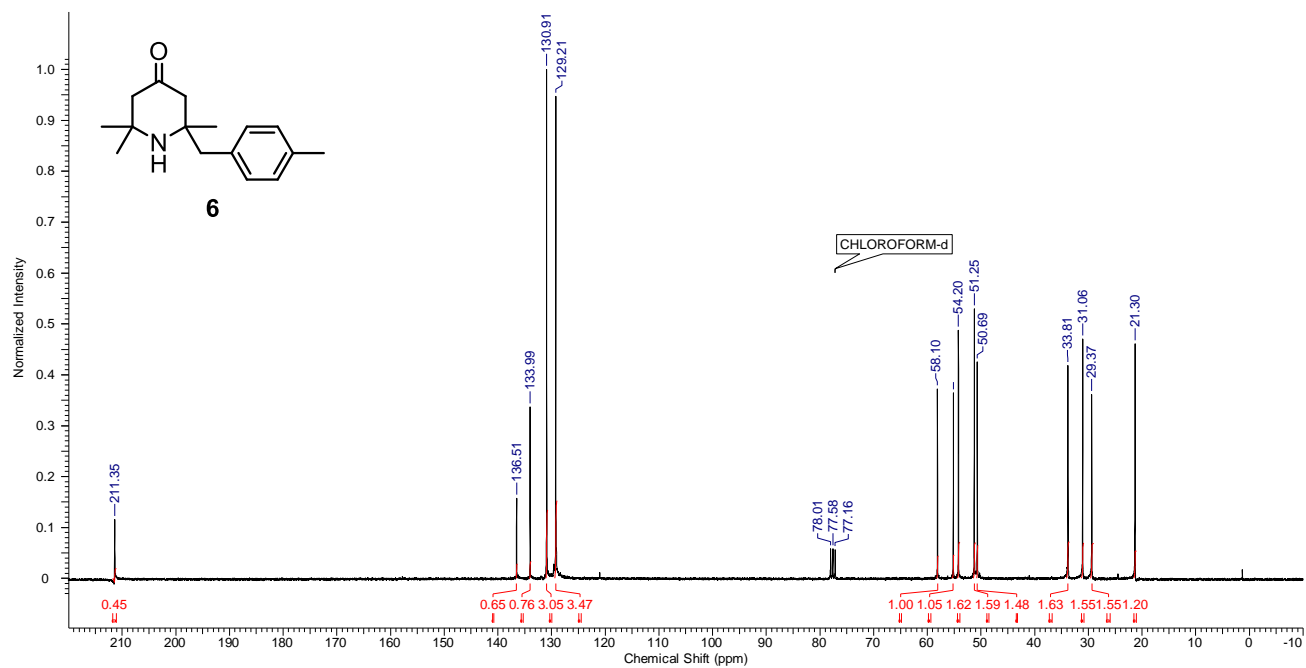

Figure S8.  $^{13}\text{C}$ -NMR spectrum of **6**.

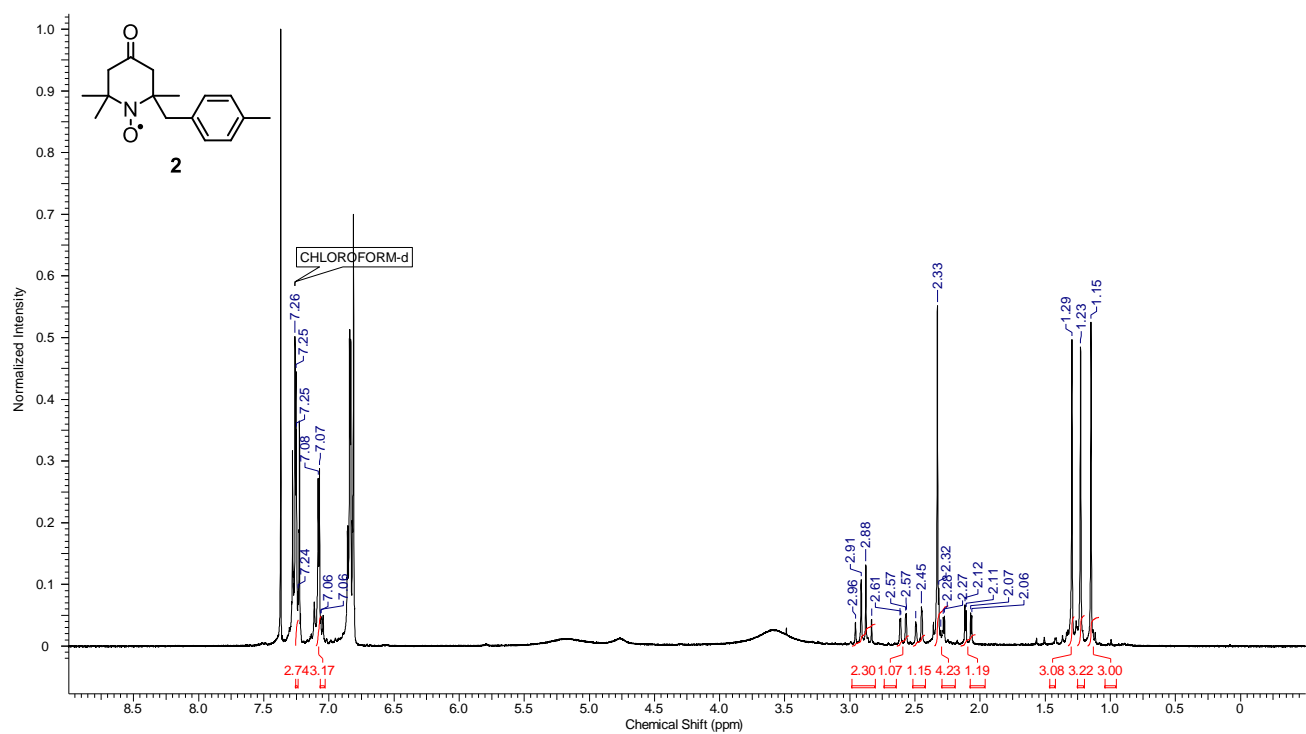

Figure S9.  $^1\text{H}$ -NMR spectrum of **2** added with phenylhydrazine.

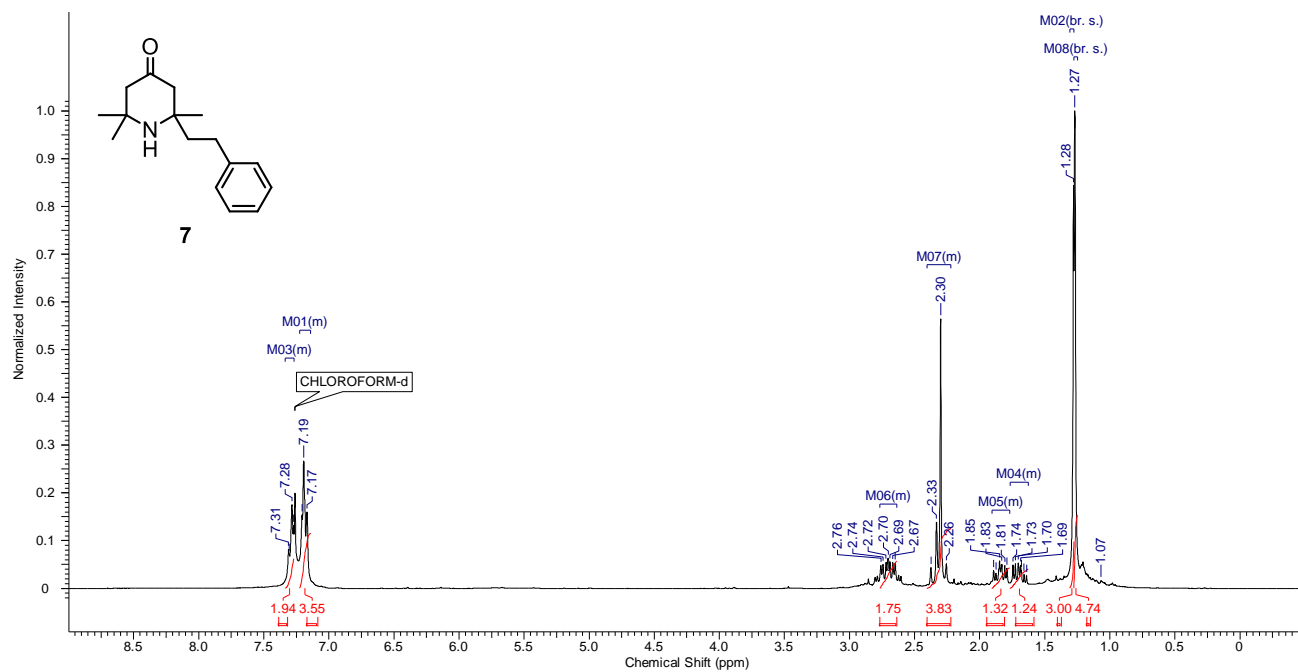

**Figure S10. <sup>1</sup>H-NMR spectrum of 7.**

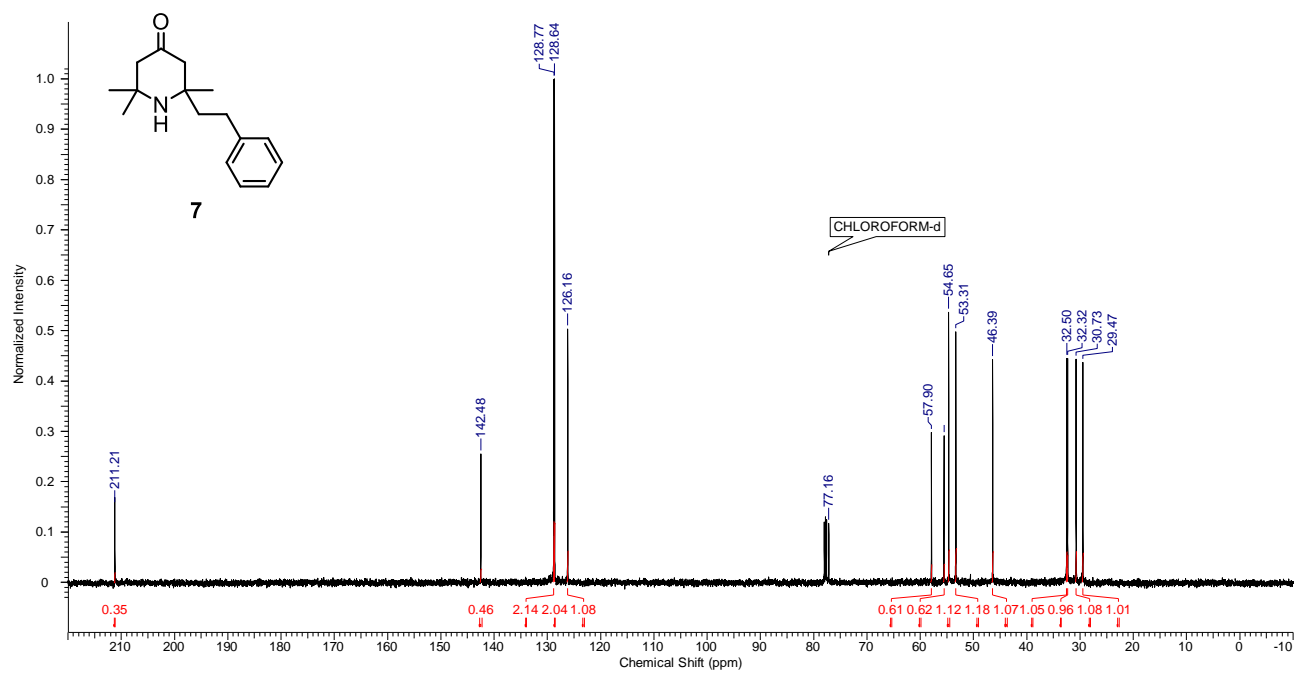

**Figure S11. <sup>13</sup>C-NMR spectrum of 7.**



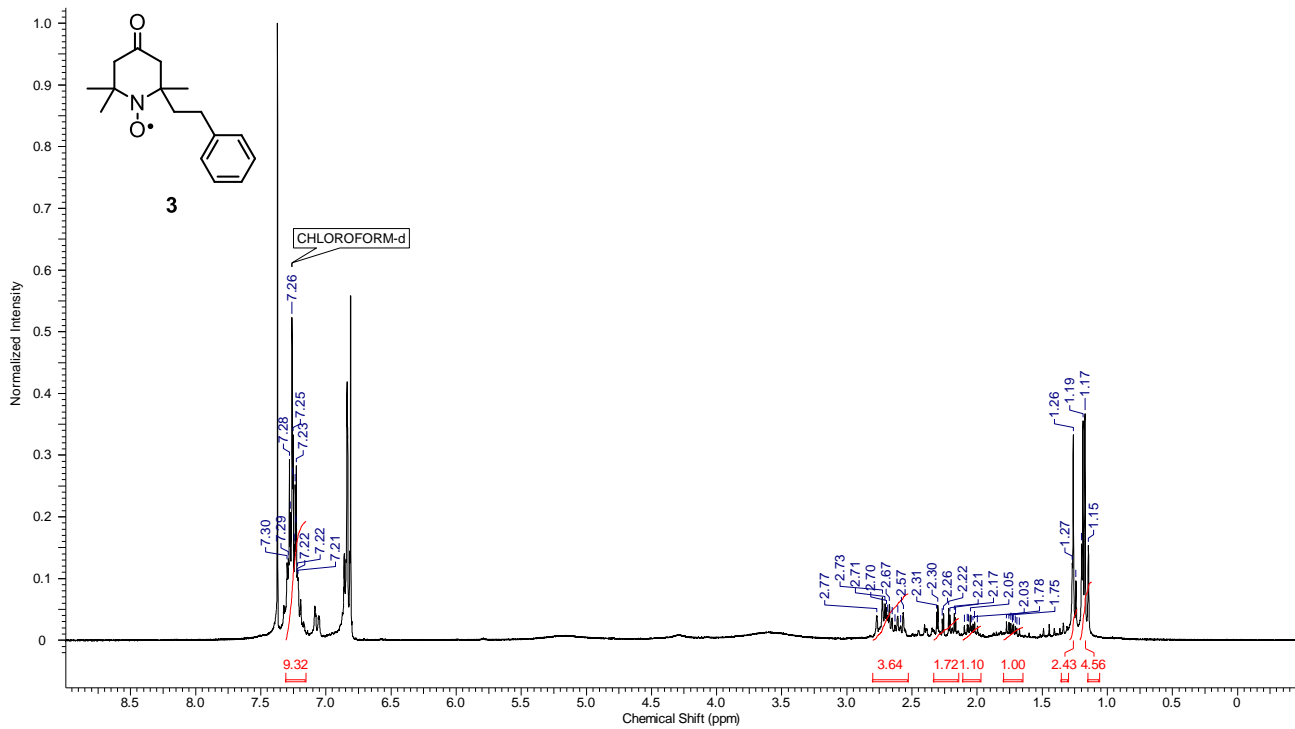

**Figure S12.** <sup>1</sup>H-NMR spectrum of **3** added with phenylhydrazine.

#### 4. HPLC chromatograms

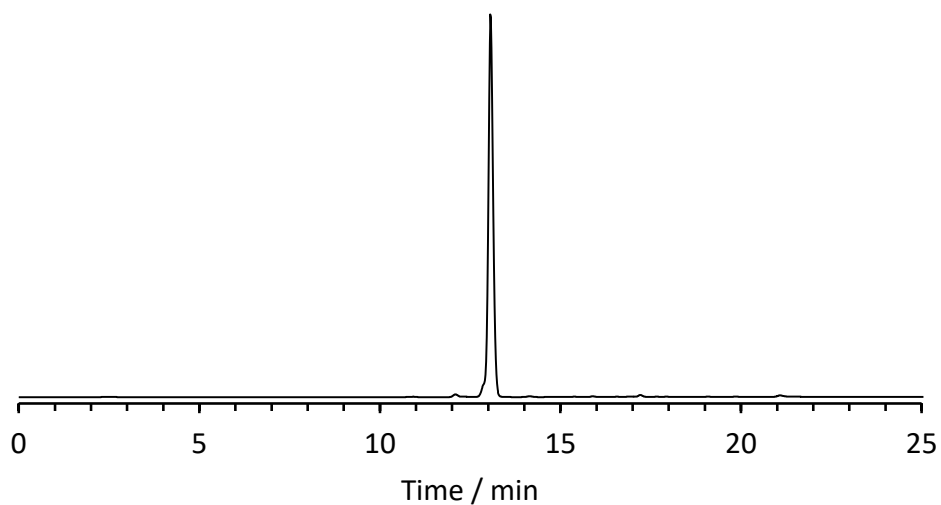

**Figure S13.** HPLC chromatogram of **1**. Measured conditions were as follows. Mobile phase: A: H<sub>2</sub>O, B: MeCN; 50% B (t = 0-5 min), 100% B (t = 15 to 25 min); column: COSMOSIL 5C<sub>18</sub>-AR-II, 4.6 mm I.D. x 250 mm; flow rate: 1 mL/min; detection: UV 254 nm.

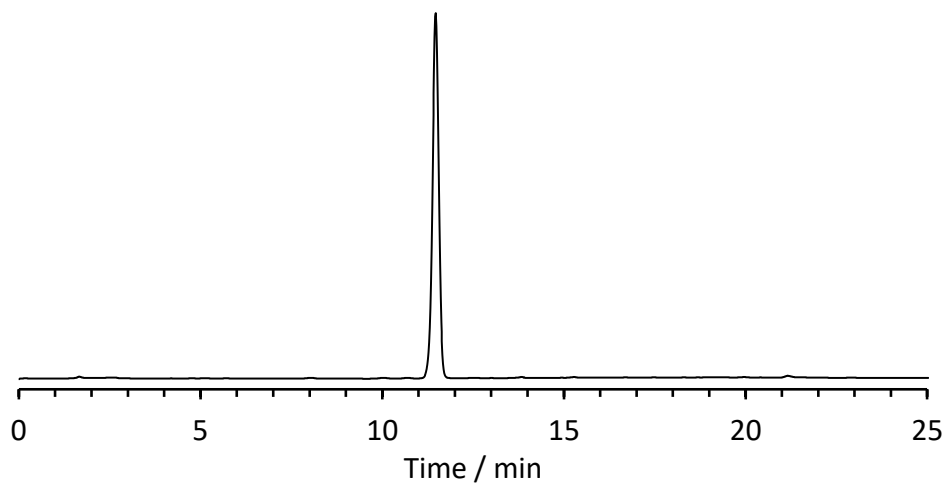

**Figure S14.** HPLC chromatogram of **2**. Measured conditions were as follows. Mobile phase: A: H<sub>2</sub>O, B: MeCN; 50% B (t = 0-5 min), 100% B (t = 15 to 25 min); column: COSMOSIL 5C<sub>18</sub>-AR-II, 4.6 mm I.D. x 250 mm; flow rate: 1 mL/min; detection: UV 254 nm.

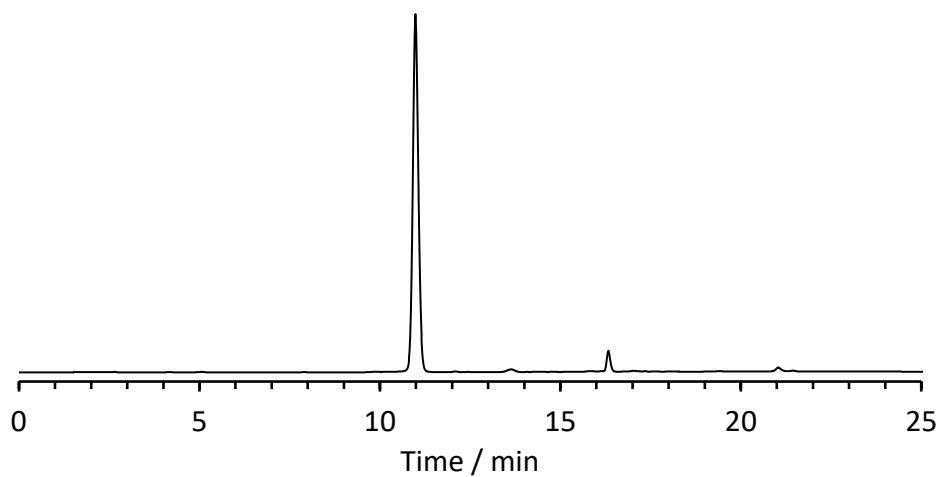

**Figure S15.** HPLC chromatogram of **3**. Measured conditions were as follows. Mobile phase: A: H<sub>2</sub>O, B: MeCN; 50% B (t = 0-5 min), 100% B (t = 15 to 25 min); column: COSMOSIL 5C<sub>18</sub>-AR-II, 4.6 mm I.D. x 250 mm; flow rate: 1 mL/min; detection: UV 254 nm.
